# Supplementary material
Source: PubMed Central journal article supplement (PMC5266609)

## SUPPLEMENTARY FIGURE LEGENDS

**Supplementary Figure 1. Hepatic Lipid Levels Expressed on the Basis of nmol/mg Liver Wet Weight.** All conditions were as described in legend to Figure 3 except that hepatic lipid levels were expressed on the basis of nmol/mg liver wet weight. Total hepatic lipid (A), hepatic neutral lipid (B), hepatic phospholipid (C) and hepatic triacylglycerol (D). Means +/- SE; n= 8 animals per group; <sup>#</sup>p < 0.05 between phytol-fed WT versus phytol-fed TKO mice.

**Supplementary Figure 2. Serum Lipid Levels Expressed on the Basis of nmol/mg Serum Protein.** All conditions were as described in legend to Figure 8 except that serum lipid levels were expressed on the basis of nmol/mg serum protein. Serum free cholesterol (A) and serum cholesteryl ester (B). Means +/- SE; n= 8 animals per group; <sup>#</sup>p < 0.05 between phytol-fed WT versus phytol-fed TKO mice.

Supplementary Figure 1

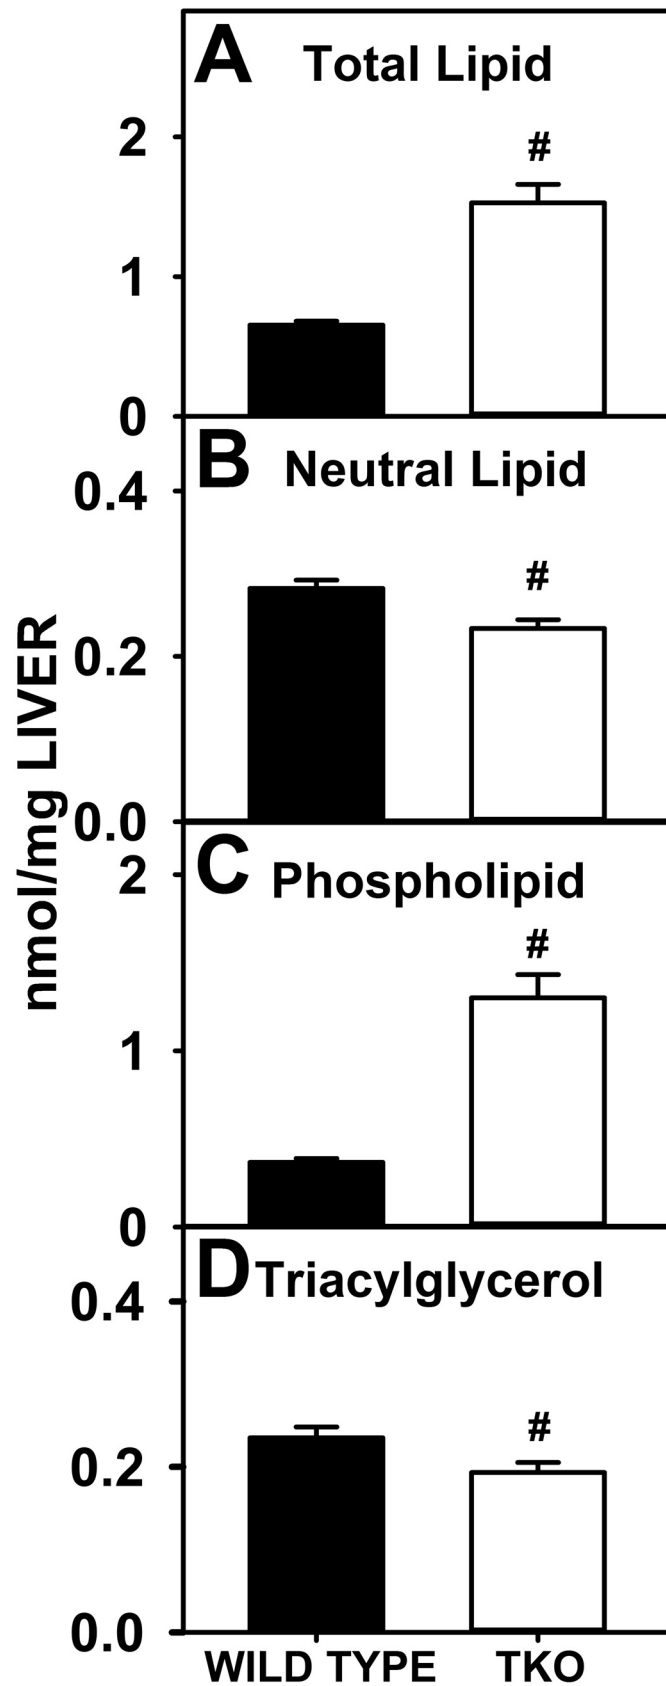

Supplementary Figure 2

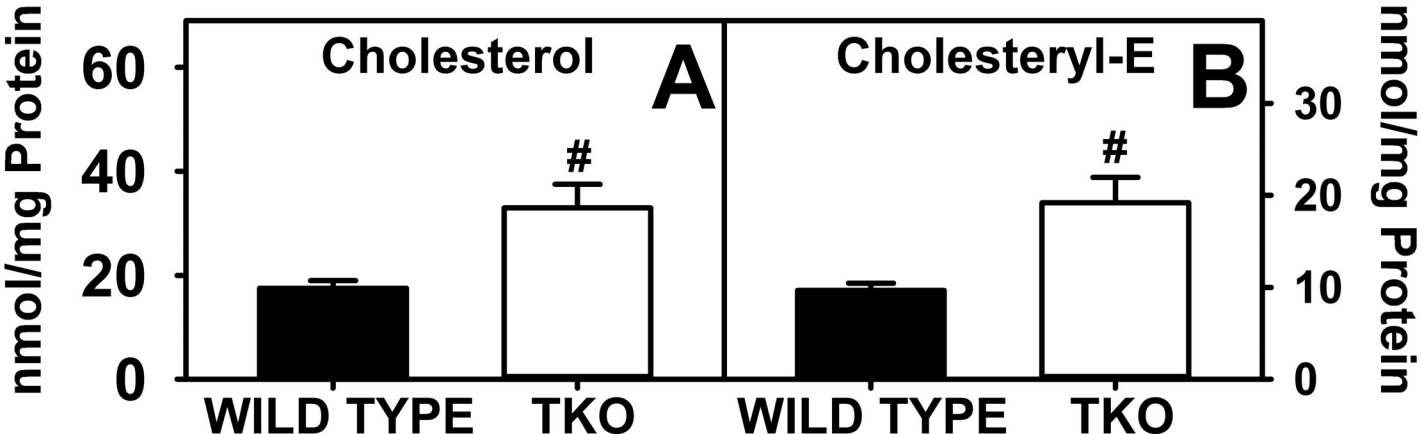

Supplement: NIHMS838922-supplement.pdf [file NIHMS838922-supplement.pdf]
